# Supplementary material for: Efficacy of Kan Jang® in Patients with Mild COVID-19: A Randomized, Quadruple-Blind, Placebo-Controlled Trial
Source: Pharmaceuticals (Basel). 2023 Aug 22;16(9):1196. doi: 10.3390/ph16091196 (PMC10535596; doi:10.3390/ph16091196)
Supplement: Supplementary file 1 [file pharmaceuticals-16-01196-s001.zip]

Archive with 5 entries (5 files):
- Supplement 1. 140 KJ Dataset.xlsx
- Supplement 2 Figures  S1-S57.pdf
- Supplement 3 Safety.pdf
- Supplement 5 KJ Compliance 140.pdf
- Supplement 4 CONSORT-checklist.pdf
