# Supplementary material for: Efficacy of Kan Jang® in Patients with Mild COVID-19: A Randomized, Quadruple-Blind, Placebo-Controlled Trial
Source: Pharmaceuticals (Basel). 2023 Aug 22;16(9):1196. doi: 10.3390/ph16091196 (PMC10535596; doi:10.3390/ph16091196)
Supplement: Supplementary file 1 [file pharmaceuticals-16-01196-s001.zip › Supplement 1. 140 KJ Dataset.xlsx]

## Sheet: Total Data Set all in one
					Day 1	Day 7	Day 14	Day 21	event	Kaplan			Day 1	Day 3	Day 5	Day 7	Day 9	Day 11	Day 14	Day 17	Day 21	event	Kaplan			Day 1	Day 3	Day 5	Day 7	Day 9	Day 11	Day 14	Day 21													Day 1	Day 3	Day 5	Day 7
	Dropout Date	Group	Code		Visit 1	Visit 2	Visit 3	Visit 4			Code		Visit 1			Visit 2			Visit 3		Visit 4			Code		Visit 1			Visit 2			Visit 3	Visit 4									event	Kaplan	Code		Visit 1			Visit 2
1		A	1	COVID-19 PCR test	1	1	1	NA	21	0	1	Body temperature	37.4	37.7	38	38	37.4	36.6	36.6	36.4	36.4	11	1	1	Fatigue	1	2	2	2	1	1	1	0	0	1	1	1	0	0	0	-1	21	1	1	Headache	1	2	2	1
2	2021-06-20	A	2	COVID-19 PCR test	1	0	0	NA	7	0	2	Body temperature	37.1	37.2	37.3	37	36.7	36.3	36.3	NA	NA	9	0	2	Fatigue	2	2	2	1	1	1	1	NA	0	0	0	-1	-1	-1	-1	#VALUE!	21	0	2	Headache	1	1	1	1
3		A	3	COVID-19 PCR test	1	1	1	NA	21	0	3	Body temperature	37.2	37.3	37.1	37	36.6	37	36.8	36.6	36.4	9	1	3	Fatigue	1	2	2	2	1	1	1	0	0	1	1	1	0	0	0	-1	21	1	3	Headache	1	1	1	2
4		A	4	COVID-19 PCR test	1	1	0	NA	14	0	4	Body temperature	37.5	37.9	37.7	37.9	37.5	37	36.4	36.6	36.6	14	1	4	Fatigue	2	2	2	2	1	1	0	0	0	0	0	0	-1	-1	-2	-2	14	1	4	Headache	2	2	2	2
5		B	5	COVID-19 PCR test	1	1	0	NA	14	0	5	Body temperature	37.2	36.8	37.1	36.6	36.6	36.6	36.7	36.4	36.4	7	1	5	Fatigue	1	1	1	1	1	0	0	0	0	0	0	0	0	-1	-1	-1	9	1	5	Headache	0	0	0	0
6	2021-06-10	A	6	COVID-19 PCR test	1	NA	NA	NA	7	0	6	Body temperature	37	NA	NA	NA	NA	NA	NA	NA	NA	3	0	6	Fatigue	1	NA	NA	NA	NA	NA	NA	NA	0	#VALUE!	#VALUE!	#VALUE!	#VALUE!	#VALUE!	#VALUE!	#VALUE!	3	0	6	Headache	1	NA	NA	NA
7		B	7	COVID-19 PCR test	1	1	1	NA	21	0	7	Body temperature	38	38.5	37.8	37	36.6	36.4	36.6	36.7	36.6	9	1	7	Fatigue	1	2	2	2	1	1	0	0	0	1	1	1	0	0	-1	-1	14	1	7	Headache	1	2	1	1
8	2021-06-16	B	8	COVID-19 PCR test	1	1	NA	NA	14	2	8	Body temperature	37	37.5	38.5	38.6	NA	NA	NA	NA	NA	9	0	8	Fatigue	1	2	2	3	NA	NA	NA	NA	0	1	1	2	#VALUE!	#VALUE!	#VALUE!	#VALUE!	9	0	8	Headache	1	2	2	3
9	2021-06-17	B	9	COVID-19 PCR test	1	1	NA	NA	14	2	9	Body temperature	38	38.5	38.4	39	NA	NA	NA	NA	NA	9	0	9	Fatigue	2	2	2	3	NA	NA	NA	NA	0	0	0	1	#VALUE!	#VALUE!	#VALUE!	#VALUE!	9	0	9	Headache	2	2	2	3
10	2021-06-16	B	10	COVID-19 PCR test	1	NA	NA	NA	7	2	10	Body temperature	38	38.5	39	NA	NA	NA	NA	NA	NA	7	0	10	Fatigue	2	2	3	NA	NA	NA	NA	NA	0	0	1	#VALUE!	#VALUE!	#VALUE!	#VALUE!	#VALUE!	7	0	10	Headache	0	0	0	NA
11	2021-06-18	B	11	COVID-19 PCR test	1	1	NA	NA	14	2	11	Body temperature	37.5	38	38.5	38.5	NA	NA	NA	NA	NA	9	0	11	Fatigue	2	2	2	3	NA	NA	NA	NA	0	0	0	1	#VALUE!	#VALUE!	#VALUE!	#VALUE!	9	0	11	Headache	0	0	0	0
12		B	12	COVID-19 PCR test	1	1	1	NA	21	0	12	Body temperature	37.4	36.6	36.7	36.4	36.4	36.4	36.6	36.6	36.6	3	1	12	Fatigue	1	1	1	1	0	0	0	0	0	0	0	0	-1	-1	-1	-1	9	1	12	Headache	1	1	1	1
13		A	13	COVID-19 PCR test	1	1	0	NA	14	0	13	Body temperature	37.3	37.1	36.6	36.6	36.6	36.4	36.6	36.6	36.6	5	1	13	Fatigue	1	1	1	1	0	0	0	0	0	0	0	0	-1	-1	-1	-1	9	1	13	Headache	1	1	1	1
14	2021-06-22	B	14	COVID-19 PCR test	1	1	NA	NA	14	2	14	Body temperature	37.7	38.5	38	38.8	NA	NA	NA	NA	NA	9	0	14	Fatigue	2	2	2	3	NA	NA	NA	NA	0	0	0	1	#VALUE!	#VALUE!	#VALUE!	#VALUE!	9	0	14	Headache	0	0	0	0
15	2021-06-22	B	15	COVID-19 PCR test	1	1	NA	NA	14	2	15	Body temperature	39	38.8	38.5	38.8	NA	NA	NA	NA	NA	9	0	15	Fatigue	2	3	3	3	NA	NA	NA	NA	0	1	1	1	#VALUE!	#VALUE!	#VALUE!	#VALUE!	9	0	15	Headache	2	3	3	3
16		B	16	COVID-19 PCR test	1	1	0	NA	14	0	16	Body temperature	36.9	36.6	36.7	36.4	36.6	36.6	36.6	36.6	36.6	1	1	16	Fatigue	1	1	1	1	0	0	0	0	0	0	0	0	-1	-1	-1	-1	9	1	16	Headache	1	1	1	1
17		B	17	COVID-19 PCR test	1	1	1	NA	21	0	17	Body temperature	37.5	38	37.7	37.5	36.6	36.6	36.4	36.4	36.6	9	1	17	Fatigue	2	2	2	2	1	1	0	0	0	0	0	0	-1	-1	-2	-2	14	1	17	Headache	2	2	2	2
18		B	18	COVID-19 PCR test	1	1	0	NA	14	0	18	Body temperature	37.2	37	36.6	36.6	36.4	36.4	36.6	36.6	36.6	5	1	18	Fatigue	1	1	1	1	0	0	0	0	0	0	0	0	-1	-1	-1	-1	9	1	18	Headache	0	0	0	0
19		B	19	COVID-19 PCR test	1	1	1	NA	21	0	19	Body temperature	37.2	38	38	37.4	36.4	36.6	36.4	36.5	36.6	9	1	19	Fatigue	2	2	2	2	1	1	0	0	0	0	0	0	-1	-1	-2	-2	14	1	19	Headache	0	0	0	0
20		A	20	COVID-19 PCR test	1	1	0	NA	14	0	20	Body temperature	37.3	37.4	37.5	36.4	36.6	36.6	36.4	36.8	36.4	7	1	20	Fatigue	1	2	2	1	1	1	1	0	0	1	1	0	0	0	0	-1	21	1	20	Headache	0	0	0	0
21	2021-07-13	A	21	COVID-19 PCR test	1	1	NA	NA	14	2	21	Body temperature	37.3	37.2	38	38.5	NA	NA	NA	NA	NA	9	0	21	Fatigue	1	2	2	3	NA	NA	NA	NA	0	1	1	2	#VALUE!	#VALUE!	#VALUE!	#VALUE!	9	0	21	Headache	1	2	2	2
22		A	22	COVID-19 PCR test	1	1	0	NA	14	0	22	Body temperature	37.7	37.5	37.4	37.4	37	36.8	36.6	36.6	36.6	11	1	22	Fatigue	2	2	2	1	1	1	1	0	0	0	0	-1	-1	-1	-1	-2	21	1	22	Headache	2	2	2	1
23		A	23	COVID-19 PCR test	1	1	1	NA	21	0	23	Body temperature	38	37.5	37.4	36.5	36.6	36.4	36.5	36.7	36.4	7	1	23	Fatigue	2	2	2	2	1	1	1	0	0	0	0	0	-1	-1	-1	-2	21	1	23	Headache	0	0	0	0
24		B	24	COVID-19 PCR test	1	1	0	NA	14	0	24	Body temperature	38	37.7	37.4	37	36.8	36.5	36.6	36.7	36.8	9	1	24	Fatigue	2	2	2	1	1	1	1	0	0	0	0	-1	-1	-1	-1	-2	21	1	24	Headache	2	2	2	1
25	2021-08-25	B	25	COVID-19 PCR test	1	1	NA	NA	14	0	25	Body temperature	38.5	37.8	37.7	37.4	NA	NA	NA	NA	NA	7	0	25	Fatigue	2	2	2	2	NA	NA	NA	NA	0	0	0	0	#VALUE!	#VALUE!	#VALUE!	#VALUE!	9	0	25	Headache	2	2	2	2
26		B	26	COVID-19 PCR test	1	1	0	NA	14	0	26	Body temperature	37.5	37.4	37.3	36.8	36.9	36.4	36.6	36.7	36.8	7	1	26	Fatigue	1	2	2	1	1	1	1	0	0	1	1	0	0	0	0	-1	21	1	26	Headache	2	2	2	2
27	2021-09-14	A	27	COVID-19 PCR test	1	1	NA	NA	14	2	27	Body temperature	38.5	37.5	37.7	37.9	NA	NA	NA	NA	NA	9	0	27	Fatigue	2	2	2	3	NA	NA	NA	NA	0	0	0	1	#VALUE!	#VALUE!	#VALUE!	#VALUE!	9	0	27	Headache	0	0	0	0
28		A	28	COVID-19 PCR test	1	0	NA	NA	7	0	28	Body temperature	38	37.5	37.1	36.4	36.5	36.6	36.7	36.6	36.6	7	1	28	Fatigue	2	2	2	2	1	1	0	0	0	0	0	0	-1	-1	-2	-2	14	1	28	Headache	2	2	2	1
29	2021-10-12	A	29	COVID-19 PCR test	1	1	NA	NA	14	0	29	Body temperature	37.8	37.6	37.4	37	NA	NA	NA	NA	NA	9	0	29	Fatigue	2	2	2	1	NA	NA	NA	NA	0	0	0	-1	#VALUE!	#VALUE!	#VALUE!	#VALUE!	9	0	29	Headache	2	2	2	1
30		B	30	COVID-19 PCR test	1	1	0	NA	14	0	30	Body temperature	37.8	37.6	37.4	37.2	37	36	36.4	36.2	36.3	11	1	30	Fatigue	2	2	2	2	1	1	1	0	0	0	0	0	-1	-1	-1	-2	21	1	30	Headache	0	0	0	0
31		B	31	COVID-19 PCR test	1	1	1	NA	21	0	31	Body temperature	37.5	37	36.5	36.4	36.3	36	36.2	36.3	36.4	5	1	31	Fatigue	2	2	2	2	0	0	0	0	0	0	0	0	-2	-2	-2	-2	9	1	31	Headache	2	2	2	2
32	2021-10-18	B	32	COVID-19 PCR test	1	1	NA	NA	14	0	32	Body temperature	37.3	37.2	37	36.4	36.6	36.7	NA	NA	NA	7	0	32	Fatigue	2	2	2	1	1	0	NA	NA	0	0	0	-1	-1	-2	#VALUE!	#VALUE!	14	1	32	Headache	2	2	2	1
33		B	33	COVID-19 PCR test	1	1	1	NA	21	0	33	Body temperature	38	37.5	37.4	36.5	36.4	36.7	36.4	36.3	36.4	7	1	33	Fatigue	2	2	2	1	1	1	1	0	0	0	0	-1	-1	-1	-1	-2	14	1	33	Headache	2	2	1	1
34		B	34	COVID-19 PCR test	1	1	0	NA	14	0	34	Body temperature	37.4	37.5	37.2	37	36.6	36.4	36.3	36.3	36.4	9	1	34	Fatigue	3	3	2	2	1	1	1	1	0	0	-1	-1	-2	-2	-2	-2	22	1	34	Headache	3	3	2	2
35	2021-10-19	B	35	COVID-19 PCR test	1	NA	NA	NA	7	0	35	Body temperature	37.8	NA	NA	NA	NA	NA	NA	NA	NA	3	0	35	Fatigue	2	NA	NA	NA	NA	NA	NA	NA	0	#VALUE!	#VALUE!	#VALUE!	#VALUE!	#VALUE!	#VALUE!	#VALUE!	3	0	35	Headache	2	NA	NA	NA
36		A	36	COVID-19 PCR test	1	1	0	NA	14	0	36	Body temperature	37.7	37.6	37	36.4	36.6	36.6	36.6	36.6	36.6	7	1	36	Fatigue	2	2	2	2	1	1	1	0	0	0	0	0	-1	-1	-1	-2	21	1	36	Headache	2	2	2	1
37		B	37	COVID-19 PCR test	1	1	1	NA	21	0	37	Body temperature	38.5	38	37.5	36.4	36.6	36.4	36.6	36.6	36.6	7	1	37	Fatigue	2	2	2	1	1	1	1	0	0	0	0	-1	-1	-1	-1	-2	21	1	37	Headache	2	2	2	1
38		A	38	COVID-19 PCR test	1	1	1	NA	21	0	38	Body temperature	37.8	38	37.6	37.4	36.4	36.8	36.4	36.2	36.4	9	1	38	Fatigue	2	2	1	1	1	1	1	0	0	0	-1	-1	-1	-1	-1	-2	21	1	38	Headache	2	2	1	1
39		A	39	COVID-19 PCR test	1	1	1	NA	21	0	39	Body temperature	38	37.8	37.1	36.4	36.7	36.4	36.4	36.4	36.6	7	1	39	Fatigue	2	2	2	1	1	1	1	0	0	0	0	-1	-1	-1	-1	-2	21	1	39	Headache	2	2	2	1
40	2021-10-29	A	40	COVID-19 PCR test	1	1	NA	NA	14	2	40	Body temperature	37.7	38	38.5	38	NA	NA	NA	NA	NA	9	0	40	Fatigue	2	2	2	3	NA	NA	NA	NA	0	0	0	1	#VALUE!	#VALUE!	#VALUE!	#VALUE!	9	0	40	Headache	2	2	2	3
41	2021-10-29	B	41	COVID-19 PCR test	1	NA	NA	NA	7	0	41	Body temperature	38	37.8	NA	NA	NA	NA	NA	NA	NA	5	0	41	Fatigue	2	2	NA	NA	NA	NA	NA	NA	0	0	#VALUE!	#VALUE!	#VALUE!	#VALUE!	#VALUE!	#VALUE!	5	0	41	Headache	2	2	NA	NA
42		B	42	COVID-19 PCR test	1	1	0	NA	14	0	42	Body temperature	37.8	37.5	37.6	37.8	36.5	36.8	36.8	36.6	36.6	9	1	42	Fatigue	2	2	2	2	2	2	1	0	0	0	0	0	0	0	-1	-2	21	1	42	Headache	2	2	2	2
43		B	43	COVID-19 PCR test	1	1	1	NA	21	0	43	Body temperature	37.8	37.6	37.4	37.4	36.8	36.6	36.4	36.4	36.5	9	1	43	Fatigue	2	2	1	1	1	1	0	0	0	0	-1	-1	-1	-1	-2	-2	14	1	43	Headache	2	2	1	1
44	2021-11-21	B	44	COVID-19 PCR test	1	1	NA	NA	14	0	44	Body temperature	37.6	37.7	37.4	36.4	36.5	36.6	NA	NA	NA	7	0	44	Fatigue	2	2	1	2	1	1	NA	NA	0	0	-1	0	-1	-1	#VALUE!	#VALUE!	14	0	44	Headache	2	2	1	1
45		B	45	COVID-19 PCR test	1	1	0	NA	14	0	45	Body temperature	37.5	37.4	37.2	37	36.8	36.9	36.4	36	36.4	9	1	45	Fatigue	2	2	1	1	0	0	0	0	0	0	-1	-1	-2	-2	-2	-2	9	1	45	Headache	2	2	1	1
46		B	46	COVID-19 PCR test	1	1	0	NA	14	0	46	Body temperature	37.8	38	37.2	36.8	36.9	37	36.5	36.4	36.6	7	1	46	Fatigue	2	2	2	1	0	0	0	0	0	0	0	-1	-2	-2	-2	-2	9	1	46	Headache	2	2	2	1
47		A	47	COVID-19 PCR test	1	1	0	NA	14	0	47	Body temperature	37.8	37.5	36.8	36.5	36.6	36.9	36.6	36.6	36.4	5	1	47	Fatigue	2	2	2	1	1	1	1	0	0	0	0	-1	-1	-1	-1	-2	21	1	47	Headache	2	2	2	1
48		B	48	COVID-19 PCR test	1	1	0	NA	14	0	48	Body temperature	37.5	37.3	37.6	37.1	36.6	36.6	36.7	36.4	36.6	9	1	48	Fatigue	2	2	2	1	0	0	0	0	0	0	0	-1	-2	-2	-2	-2	9	1	48	Headache	2	2	2	1
49		B	49	COVID-19 PCR test	1	1	0	NA	14	0	49	Body temperature	37.8	37.5	37.2	36.4	36.6	36.2	36.4	36.2	36.1	7	1	49	Fatigue	2	2	1	1	0	0	0	0	0	0	-1	-1	-2	-2	-2	-2	9	1	49	Headache	2	2	1	1
50	2021-12-15	B	50	COVID-19 PCR test	1	1	NA	NA	14	0	50	Body temperature	38	37.8	37.2	36.5	36.6	36.6	NA	NA	NA	7	0	50	Fatigue	2	2	2	1	0	0	NA	NA	0	0	0	-1	-2	-2	#VALUE!	#VALUE!	9	1	50	Headache	2	2	2	1
51	2021-12-05	B	51	COVID-19 PCR test	1	NA	NA	NA	7	2	51	Body temperature	38	39	NA	NA	NA	NA	NA	NA	NA	5	0	51	Fatigue	3	3	NA	NA	NA	NA	NA	NA	0	0	#VALUE!	#VALUE!	#VALUE!	#VALUE!	#VALUE!	#VALUE!	5	0	51	Headache	0	0	NA	NA
52	2021-12-05	B	52	COVID-19 PCR test	1	NA	NA	NA	7	2	52	Body temperature	38	38.5	NA	NA	NA	NA	NA	NA	NA	5	0	52	Fatigue	3	3	NA	NA	NA	NA	NA	NA	0	0	#VALUE!	#VALUE!	#VALUE!	#VALUE!	#VALUE!	#VALUE!	5	0	52	Headache	0	0	NA	NA
53	2021-12-05	B	53	COVID-19 PCR test	1	NA	NA	NA	7	2	53	Body temperature	38.2	38.8	NA	NA	NA	NA	NA	NA	NA	5	0	53	Fatigue	2	3	NA	NA	NA	NA	NA	NA	0	1	#VALUE!	#VALUE!	#VALUE!	#VALUE!	#VALUE!	#VALUE!	5	0	53	Headache	2	3	NA	NA
54	2021-12-05	B	54	COVID-19 PCR test	1	NA	NA	NA	7	2	54	Body temperature	38	38.5	NA	NA	NA	NA	NA	NA	NA	5	0	54	Fatigue	2	3	NA	NA	NA	NA	NA	NA	0	1	#VALUE!	#VALUE!	#VALUE!	#VALUE!	#VALUE!	#VALUE!	5	0	54	Headache	2	3	NA	NA
55		B	55	COVID-19 PCR test	1	1	1	NA	21	0	55	Body temperature	37.5	37	36.8	36.4	36.2	36.6	36.6	36.5	36.6	5	1	55	Fatigue	2	2	2	1	0	0	0	0	0	0	0	-1	-2	-2	-2	-2	9	1	55	Headache	2	2	2	1
56	2021-12-16	A	56	COVID-19 PCR test	1	1	NA	NA	14	0	56	Body temperature	37.5	37.7	37.2	36.5	36.6	36.5	NA	NA	NA	7	0	56	Fatigue	2	2	1	1	1	0	NA	NA	0	0	-1	-1	-1	-2	#VALUE!	#VALUE!	14	0	56	Headache	2	2	1	1
57	2021-12-16	B	57	COVID-19 PCR test	1	1	NA	NA	14	0	57	Body temperature	37.2	37.1	37	36.6	36.5	36.5	NA	NA	NA	7	0	57	Fatigue	1	1	1	1	0	0	NA	NA	0	0	0	0	-1	-1	#VALUE!	#VALUE!	9	1	57	Headache	0	0	0	0
58		A	58	COVID-19 PCR test	1	1	0	NA	14	0	58	Body temperature	38	37.8	37.5	37.2	36.8	36.6	36.4	36.4	36.5	9	1	58	Fatigue	2	2	2	1	1	1	1	0	0	0	0	-1	-1	-1	-1	-2	21	1	58	Headache	2	2	1	0
59		A	59	COVID-19 PCR test	1	1	1	NA	21	0	59	Body temperature	37.2	37	37.1	36.5	36.6	36.4	36.4	36.5	36.4	7	1	59	Fatigue	2	2	2	1	1	1	1	0	0	0	0	-1	-1	-1	-1	-2	21	1	59	Headache	2	2	1	1
60		B	60	COVID-19 PCR test	1	1	0	NA	14	0	60	Body temperature	37.3	37.2	37.1	36.8	36.6	36.5	36.4	36.4	36.6	7	1	60	Fatigue	2	2	1	1	1	0	1	0	0	0	-1	-1	-1	-2	-1	-2	21	1	60	Headache	2	2	1	1
61		A	61	COVID-19 PCR test	1	1	0	NA	14	0	61	Body temperature	37.5	37.4	37.1	36.6	36.6	36.6	36.4	36.4	36.4	7	1	61	Fatigue	2	2	2	2	2	2	1	0	0	0	0	0	0	0	-1	-2	21	1	61	Headache	2	2	2	2
62		B	62	COVID-19 PCR test	1	1	0	NA	14	0	62	Body temperature	37.5	37.2	36.4	36.6	36.4	36.6	36.6	36.6	36.6	7	1	62	Fatigue	1	1	1	1	0	0	0	0	0	0	0	0	-1	-1	-1	-1	9	1	62	Headache	2	2	0	0
63		A	63	COVID-19 PCR test	1	1	0	NA	14	0	63	Body temperature	37	37.5	37.6	36.4	36.6	36.4	36.4	36.4	36.6	7	1	63	Fatigue	2	2	2	0	0	0	0	0	0	0	0	-2	-2	-2	-2	-2	7	1	63	Headache	2	2	2	0
64		B	64	COVID-19 PCR test	1	1	0	NA	14	0	64	Body temperature	37.5	37.6	37.2	36.6	36.4	36	36.2	36.4	36.6	7	1	64	Fatigue	2	1	1	1	1	0	0	0	0	-1	-1	-1	-1	-2	-2	-2	11	1	64	Headache	2	2	2	2
65	2022-01-06	B	65	COVID-19 PCR test	1	1	NA	NA	14	0	65	Body temperature	37.5	37.7	37.4	37.2	36.8	36.6				9	0	65	Fatigue	2	2	2	2	0	0			0	0	0	0	-2	-2	-2	-2	9	1	65	Headache	2	2	2	2
66		B	66	COVID-19 PCR test	1	0	NA	NA	7	0	66	Body temperature	37.2	37	36.6	36.4	36.6	36.6	36.5	36.6	36.6	5	1	66	Fatigue	1	1	1	0	0	0	0	0	0	0	0	-1	-1	-1	-1	-1	7	1	66	Headache	1	1	1	0
67		B	67	COVID-19 PCR test	1	0	NA	NA	7	0	67	Body temperature	37.2	37.1	37	36.5	36.6	36.6	36.7	36.4	36.6	7	1	67	Fatigue	2	2	2	1	0	0	0	0	0	0	0	-1	-2	-2	-2	-2	9	1	67	Headache	2	2	2	2
68		B	68	COVID-19 PCR test	1	0	NA	NA	7	0	68	Body temperature	37.5	37	36.5	36.6	36.4	36.5	36.6	36.6	36.6	5	1	68	Fatigue	2	2	1	0	0	0	0	0	0	0	-1	-2	-2	-2	-2	-2	7	1	68	Headache	2	2	2	2
69		A	69	COVID-19 PCR test	1	0	NA	NA	7	0	69	Body temperature	38	38	37.8	37.5	36.5	36.6	36.4	36.5	36.6	9	1	69	Fatigue	2	2	2	0	0	0	0	0	0	0	0	-2	-2	-2	-2	-2	7	1	69	Headache	2	2	2	2
70		B	70	COVID-19 PCR test	1	0	NA	NA	7	0	70	Body temperature	37.5	37.3	37	36.5	36.6	36.5	36.6	36.6	36.4	7	1	70	Fatigue	1	1	0	0	0	0	0	0	0	0	-1	-1	-1	-1	-1	-1	5	1	70	Headache	1	1	0	0
71	2022-02-07	B	71	COVID-19 PCR test	1	0	NA	NA	7	0	71	Body temperature	37.1	37	36.4	36.6	NA	NA	NA	NA	NA	9	0	71	Fatigue	2	2	1	1	NA	NA	NA	NA	0	0	-1	-1	#VALUE!	#VALUE!	#VALUE!	#VALUE!	9	0	71	Headache	1	1	1	0
72	2022-02-07	B	72	COVID-19 PCR test	1	0	NA	NA	7	0	72	Body temperature	37	36.8	37.5	37	NA	NA	NA	NA	NA	9	0	72	Fatigue	2	2	2	2	NA	NA	NA	NA	0	0	0	0	#VALUE!	#VALUE!	#VALUE!	#VALUE!	9	0	72	Headache	2	2	2	1
73		A	73	COVID-19 PCR test	1	0	NA	NA	7	0	73	Body temperature	38.5	38	37.4	36.6	36.4	36.4	36.6	36.6	36.6	7	1	73	Fatigue	2	2	2	0	0	0	0	0	0	0	0	-2	-2	-2	-2	-2	7	1	73	Headache	2	2	0	0
74		A	74	COVID-19 PCR test	1	0	NA	NA	7	0	74	Body temperature	37.5	37	36.8	36.6	36.4	36.6	36.6	36.6	36.6	5	1	74	Fatigue	2	2	2	0	0	0	0	0	0	0	0	-2	-2	-2	-2	-2	7	1	74	Headache	2	1	1	0
75	2022-02-12	B	75	COVID-19 PCR test	1	0	NA	NA	7	0	75	Body temperature	37.2	37.3	36.6	36.6	NA	NA	NA	NA	NA	5	0	75	Fatigue	2	2	1	0	NA	NA	NA	NA	0	0	-1	-2	#VALUE!	#VALUE!	#VALUE!	#VALUE!	9	1	75	Headache	1	1	1	0
76		A	76	COVID-19 PCR test	1	0	NA	NA	7	0	76	Body temperature	38	38.5	37.5	36.5	36.4	36.6	36.4	36.6	36.6	7	1	76	Fatigue	2	2	1	0	0	0	0	0	0	0	-1	-2	-2	-2	-2	-2	7	1	76	Headache	2	2	1	0
77		A	77	COVID-19 PCR test	1	0	NA	NA	7	0	77	Body temperature	38	37.8	37.1	36.5	36.4	36.6	36.6	36.6	36.4	7	1	77	Fatigue	2	2	2	2	1	1	1	1	0	0	0	0	-1	-1	-1	-1	21	0	77	Headache	1	1	1	1
78		A	78	COVID-19 PCR test	1	0	NA	NA	7	0	78	Body temperature	37.2	37.1	36.8	36.7	36.6	36.4	36.3	36.4	36.6	5	1	78	Fatigue	1	1	1	1	1	1	0	0	0	0	0	0	0	0	-1	-1	14	1	78	Headache	1	1	1	1
79	2022-02-25	A	79	COVID-19 PCR test	1	NA	NA	NA	7	0	79	Body temperature	37.5	37.7	37	NA	NA	NA	NA	NA	NA	7	0	79	Fatigue	1	1	1	NA	NA	NA	NA	NA	0	0	0	#VALUE!	#VALUE!	#VALUE!	#VALUE!	#VALUE!	7	0	79	Headache	2	2	2	NA
80		A	80	COVID-19 PCR test	1	1	0	NA	14	0	80	Body temperature	37.7	37.2	37.5	36.9	36.8	36.6	36.4	36.4	36.6	7	1	80	Fatigue	2	2	2	2	0	0	0	0	0	0	0	0	-2	-2	-2	-2	9	1	80	Headache	2	2	2	2
81		B	81	COVID-19 PCR test	1	0	0	NA	7	0	81	Body temperature	37	37.3	37.2	37.3	37.4	36.8	36.6	36.6	36.6	11	1	81	Fatigue	1	1	1	1	1	1	1	1	0	0	0	0	0	0	0	0	22	1	81	Headache	1	1	1	0
82		B	82	COVID-19 PCR test	1	1	0	NA	14	0	82	Body temperature	37	37	37.2	37.1	36.5	36.6	36.6	36.6	36.6	9	1	82	Fatigue	1	1	1	1	1	1	1	0	0	0	0	0	0	0	0	-1	21	1	82	Headache	1	1	1	0
83		A	83	COVID-19 PCR test	1	1	0	NA	14	0	83	Body temperature	37.1	37.2	37.2	36.8	36.6	36.6	36.4	36.4	36.4	7	1	83	Fatigue	1	1	1	0	0	0	0	0	0	0	0	-1	-1	-1	-1	-1	7	1	83	Headache	1	0	1	0
84		A	84	COVID-19 PCR test	1	1	0	NA	14	0	84	Body temperature	37.2	37.3	37.1	37.1	36.8	36.8	36.7	36.7	36.7	9	1	84	Fatigue	1	1	1	1	0	0	0	0	0	0	0	0	-1	-1	-1	-1	9	1	84	Headache	1	1	1	1
85		B	85	COVID-19 PCR test	1	1	0	NA	14	0	85	Body temperature	37.1	37.1	37	36.5	36.6	36.6	36.4	36.6	36.6	7	1	85	Fatigue	1	1	1	1	1	1	1	1	0	0	0	0	0	0	0	0	22	0	85	Headache	1	1	1	1
86		A	86	COVID-19 PCR test	1	1	0	NA	14	0	86	Body temperature	37.5	37.1	37.2	36.5	36.6	36.6	36.6	36.6	36.6	7	1	86	Fatigue	1	1	1	2	2	1	0	0	0	0	0	1	1	0	-1	-1	14	1	86	Headache	2	2	2	2
87		A	87	COVID-19 PCR test	1	1	0	NA	14	0	87	Body temperature	37.7	37.3	36.8	36.9	36.5	36.7	36.6	36.5	36.6	5	1	87	Fatigue	2	2	2	1	1	1	0	0	0	0	0	-1	-1	-1	-2	-2	14	1	87	Headache	2	2	2	1
88		B	88	COVID-19 PCR test	1	0	0	NA	7	0	88	Body temperature	38.9	38.1	37.1	36.9	36.8	36.6	36.5	36.5	36.6	7	1	88	Fatigue	2	1	1	1	1	1	1	0	0	-1	-1	-1	-1	-1	-1	-2	21	1	88	Headache	1	1	1	0
89		A	89	COVID-19 PCR test	1	1	0	NA	14	0	89	Body temperature	38	37.7	37.1	36.8	36.4	36.6	36.6	36.5	36.7	7	1	89	Fatigue	2	2	2	2	1	1	1	0	0	0	0	0	-1	-1	-1	-2	21	1	89	Headache	2	2	2	1
90		A	90	COVID-19 PCR test	1	1	0	NA	14	0	90	Body temperature	38.5	37.4	37.1	36.4	36.7	36.6	36.4	36.6	36.7	7	1	90	Fatigue	2	2	2	1	1	1	0	0	0	0	0	-1	-1	-1	-2	-2	11	1	90	Headache	2	2	2	2
91		A	91	COVID-19 PCR test	1	1	0	NA	14	0	91	Body temperature	39.8	39	38.5	38	37.5	37	36.9	36.9	36.7	14	1	91	Fatigue	2	2	2	1	1	1	1	0	0	0	0	-1	-1	-1	-1	-2	21	1	91	Headache	2	2	1	1
92		B	92	COVID-19 PCR test	1	0	0	NA	7	0	92	Body temperature	38.5	38	37.5	37	36.8	36.9	36.6	36.7	36.6	9	1	92	Fatigue	2	1	1	1	1	1	1	0	0	-1	-1	-1	-1	-1	-1	-2	21	1	92	Headache	2	1	1	1
93		A	93	COVID-19 PCR test	1	1	0	NA	14	0	93	Body temperature	38	37.6	37.2	36.6	36.8	36.4	36.5	36.6	36.5	7	1	93	Fatigue	2	2	2	2	1	1	1	0	0	0	0	0	-1	-1	-1	-2	21	1	93	Headache	2	2	2	1
94		A	94	COVID-19 PCR test	1	1	0	NA	14	0	94	Body temperature	37.6	37.2	36.6	36.4	36.6	36.7	36.5	36.4	36.7	5	1	94	Fatigue	2	2	2	1	1	1	0	0	0	0	0	-1	-1	-1	-2	-2	11	1	94	Headache	2	2	2	1
95		A	95	COVID-19 PCR test	1	1	0	NA	14	0	95	Body temperature	38.5	37.8	36.7	36.6	36.5	36.7	36.5	36.4	36.6	5	1	95	Fatigue	2	2	2	1	1	0	0	0	0	0	0	-1	-1	-2	-2	-2	9	1	95	Headache	2	2	2	1
96		B	96	COVID-19 PCR test	1	1	0	NA	14	0	96	Body temperature	37.5	37.2	36.6	36.4	36.7	36.4	36.5	36.6	36.5	5	1	96	Fatigue	2	2	2	2	2	1	1	0	0	0	0	0	0	-1	-1	-2	21	1	96	Headache	2	2	2	1
97		A	97	COVID-19 PCR test	1	1	0	NA	14	0	97	Body temperature	37.8	37.3	36.6	36.4	36.7	36.6	36.4	36.7	36.6	5	1	97	Fatigue	2	2	2	1	1	0	0	0	0	0	0	-1	-1	-2	-2	-2	9	1	97	Headache	2	2	2	1
98		A	98	COVID-19 PCR test	1	1	0	NA	14	0	98	Body temperature	38.5	37.3	37.1	36.6	36.7	36.5	36.6	36.4	36.6	7	1	98	Fatigue	2	2	2	2	1	1	0	0	0	0	0	0	-1	-1	-2	-2	11	1	98	Headache	2	2	2	1
99		A	99	COVID-19 PCR test	1	1	0	NA	14	0	99	Body temperature	37.6	37.1	36.7	36.6	36.4	36.7	36.5	36.3	36.7	5	1	99	Fatigue	2	2	2	1	1	0	0	0	0	0	0	-1	-1	-2	-2	-2	9	1	99	Headache	2	2	1	1
100		A	100	COVID-19 PCR test	1	1	0	NA	14	0	100	Body temperature	37.6	37	36.8	36.5	36.7	36.6	36.7	36.3	36.5	5	1	100	Fatigue	2	2	2	1	1	1	1	0	0	0	0	-1	-1	-1	-1	-2	21	1	100	Headache	2	2	2	1
101		A	101	COVID-19 PCR test	1	1	0	NA	14	0	101	Body temperature	37.9	37.6	37.1	36.6	36.4	36.7	36.5	36.6	36.4	7	1	101	Fatigue	2	2	2	2	1	1	0	0	0	0	0	0	-1	-1	-2	-2	14	1	101	Headache	2	2	2	1
102		A	102	COVID-19 PCR test	1	1	0	NA	14	0	102	Body temperature	38.8	37.9	37.2	36.6	36.8	36.4	36.7	36.5	36.6	7	1	102	Fatigue	2	2	2	1	1	1	0	0	0	0	0	-1	-1	-1	-2	-2	14	1	102	Headache	2	2	1	1
103		B	103	COVID-19 PCR test	1	1	0	NA	14	0	103	Body temperature	36.9	36.8	36.7	36.5	36.6	36.5	36.5	36.6	36.5	1	1	103	Fatigue	2	2	2	1	1	1	0	0	0	0	0	-1	-1	-1	-2	-2	14	1	103	Headache	2	2	1	1
104		A	104	COVID-19 PCR test	1	1	0	NA	14	0	104	Body temperature	36.7	36.6	36.6	36.5	36.5	36.6	36.6	36.4	36.5	1	1	104	Fatigue	2	2	2	1	1	0	0	0	0	0	0	-1	-1	-2	-2	-2	11	1	104	Headache	0	0	0	0
105		B	105	COVID-19 PCR test	1	1	0	NA	14	0	105	Body temperature	38.7	38.2	37.3	36.8	36.5	36.7	36.4	36.5	36.6	7	1	105	Fatigue	2	2	2	1	1	0	0	0	0	0	0	-1	-1	-2	-2	-2	11	1	105	Headache	2	2	1	0
106		B	106	COVID-19 PCR test	1	NA	NA	NA	7	0	106	Body temperature	36.8	36.5	36.6	NA	NA	NA	NA	NA	NA	1	0	106	Fatigue	2	2	1	NA	NA	NA	NA	NA	0	0	-1	#VALUE!	#VALUE!	#VALUE!	#VALUE!	#VALUE!	7	0	106	Headache	2	2	1	NA
107		B	107	COVID-19 PCR test	1	NA	NA	NA	7	0	107	Body temperature	38.4	37.5	36.3	NA	NA	NA	NA	NA	NA	5	0	107	Fatigue	2	2	1	NA	NA	NA	NA	NA	0	0	-1	#VALUE!	#VALUE!	#VALUE!	#VALUE!	#VALUE!	7	0	107	Headache	2	2	1	NA
108		B	108	COVID-19 PCR test	1	NA	NA	NA	7	0	108	Body temperature	36.7	36.8	36.6	NA	NA	NA	NA	NA	NA	3	0	108	Fatigue	2	2	1	NA	NA	NA	NA	NA	0	0	-1	#VALUE!	#VALUE!	#VALUE!	#VALUE!	#VALUE!	7	0	108	Headache	2	2	1	NA
109		B	109	COVID-19 PCR test	1	1	0	NA	14	0	109	Body temperature	38.8	37.4	37.1	36.7	36.4	36.4	36.8	36.3	36.5	7	1	109	Fatigue	2	2	2	1	1	0	0	0	0	0	0	-1	-1	-2	-2	-2	11	1	109	Headache	2	2	2	1
110		B	110	COVID-19 PCR test	1	1	0	NA	14	0	110	Body temperature	38.7	38.2	37.1	36.6	36.4	36.7	36.9	36.3	36.6	7	1	110	Fatigue	2	2	1	1	1	0	0	0	0	0	-1	-1	-1	-2	-2	-2	11	1	110	Headache	2	2	1	1
111		A	111	COVID-19 PCR test	1	1	0	NA	14	0	111	Body temperature	38.4	37.2	36.8	36.4	36.5	36.7	36.6	36.6	36.7	5	1	111	Fatigue	2	1	1	0	0	0	0	0	0	-1	-1	-2	-2	-2	-2	-2	7	1	111	Headache	2	1	1	0
112		B	112	COVID-19 PCR test	1	1	0	NA	14	0	112	Body temperature	36.8	36.8	36.7	36.8	36.6	36.6	36.7	36.6	36.7	3	1	112	Fatigue	1	0	0	0	0	0	0	0	0	-1	-1	-1	-1	-1	-1	-1	3	1	112	Headache	2	1	0	0
113		B	113	COVID-19 PCR test	1	0	NA	NA	7	0	113	Body temperature	38.5	36.9	36.7	36.5	36.7	36.8	36.6	36.7	36.6	3	1	113	Fatigue	1	0	0	0	0	0	0	0	0	-1	-1	-1	-1	-1	-1	-1	3	1	113	Headache	2	1	1	0
114		A	114	COVID-19 PCR test	1	1	0	NA	14	0	114	Body temperature	38.7	37.3	36.4	36.7	36.6	36.8	36.6	36.4	36.4	5	1	114	Fatigue	2	2	1	1	0	0	0	0	0	0	-1	-1	-2	-2	-2	-2	9	1	114	Headache	2	2	1	0
115		B	115	COVID-19 PCR test	1	1	0	NA	14	0	115	Body temperature	38.8	38	37.3	36.5	36.5	36.7	36.8	36.7	36.4	7	1	115	Fatigue	2	2	1	0	0	0	0	0	0	0	-1	-2	-2	-2	-2	-2	7	1	115	Headache	2	2	1	0
116		A	116	COVID-19 PCR test	1	1	0	NA	14	0	116	Body temperature	38.1	37.3	36.4	36.7	36.7	36.5	36.4	36.6	36.6	5	1	116	Fatigue	2	2	1	0	0	0	0	0	0	0	-1	-2	-2	-2	-2	-2	7	1	116	Headache	2	2	0	0
117		A	117	COVID-19 PCR test	1	1	0	NA	14	0	117	Body temperature	38.3	37.1	36.5	36.7	36.4	36.5	36.6	36.7	36.5	5	1	117	Fatigue	2	2	1	0	0	0	0	0	0	0	-1	-2	-2	-2	-2	-2	7	1	117	Headache	2	2	0	0
118		B	118	COVID-19 PCR test	1	1	0	NA	14	0	118	Body temperature	39	38.3	37.2	36.7	36.5	36.7	36.6	36.8	36.6	7	1	118	Fatigue	3	2	2	1	0	0	0	0	0	-1	-1	-2	-3	-3	-3	-3	9	1	118	Headache	2	2	2	1
119		B	119	COVID-19 PCR test	1	1	0	NA	14	0	119	Body temperature	39.1	37.7	36.8	36.6	36.7	36.8	36.6	36.6	36.7	5	1	119	Fatigue	3	2	2	1	0	0	0	0	0	-1	-1	-2	-3	-3	-3	-3	9	1	119	Headache	2	2	1	1
120		B	120	COVID-19 PCR test	1	NA	NA	NA	7	0	120	Body temperature	37.6	36.7	36.5	NA	NA	NA	NA	NA	NA	3	0	120	Fatigue	1	1	0	NA	NA	NA	NA	NA	0	0	-1	#VALUE!	#VALUE!	#VALUE!	#VALUE!	#VALUE!	5	0	120	Headache	2	1	0	NA
121		A	121	COVID-19 PCR test	1	NA	NA	NA	7	0	121	Body temperature	37.5	36.7	36.5	NA	NA	NA	NA	NA	NA	3	0	121	Fatigue	1	1	0	NA	NA	NA	NA	NA	0	0	-1	#VALUE!	#VALUE!	#VALUE!	#VALUE!	#VALUE!	5	0	121	Headache	2	1	1	NA
122		B	122	COVID-19 PCR test	1	NA	NA	NA	7	0	122	Body temperature	38	36.9	36.7	NA	NA	NA	NA	NA	NA	3	0	122	Fatigue	2	1	1	NA	NA	NA	NA	NA	0	-1	-1	#VALUE!	#VALUE!	#VALUE!	#VALUE!	#VALUE!	7	0	122	Headache	2	1	0	NA
123		A	123	COVID-19 PCR test	1	1	0	NA	14	0	123	Body temperature	38.3	37.1	36.7	36.5	36.6	36.3	36.7	36.4	36.5	7	1	123	Fatigue	1	1	0	0	0	0	0	0	0	0	-1	-1	-1	-1	-1	-1	5	1	123	Headache	2	1	1	1
124		A	124	COVID-19 PCR test	1	NA	NA	NA	7	0	124	Body temperature	38.3	37.2	36.6	NA	NA	NA	NA	NA	NA	5	0	124	Fatigue	2	2	0	NA	NA	NA	NA	NA	0	0	-2	#VALUE!	#VALUE!	#VALUE!	#VALUE!	#VALUE!	5	0	124	Headache	2	2	0	NA
125		A	125	COVID-19 PCR test	1	NA	NA	NA	7	0	125	Body temperature	37.7	36.8	36.5	NA	NA	NA	NA	NA	NA	3	0	125	Fatigue	2	2	1	NA	NA	NA	NA	NA	0	0	-1	#VALUE!	#VALUE!	#VALUE!	#VALUE!	#VALUE!	7	0	125	Headache	2	1	0	NA
126		B	126	COVID-19 PCR test	1	1	0	NA	14	0	126	Body temperature	37.8	36.7	36.6	36.6	36.7	36.8	36.6	36.5	36.7	3	1	126	Fatigue	1	1	0	0	0	0	0	0	0	0	-1	-1	-1	-1	-1	-1	5	1	126	Headache	2	1	0	0
127		A	127	COVID-19 PCR test	1	1	0	NA	14	0	127	Body temperature	38.1	37.8	36.7	36.5	36.6	36.5	36.7	36.8	36.5	5	1	127	Fatigue	2	2	2	1	1	0	0	0	0	0	0	-1	-1	-2	-2	-2	11	1	127	Headache	2	2	2	1
128		A	128	COVID-19 PCR test	1	NA	NA	NA	7	0	128	Body temperature	38.7	37.3	36.6	NA	NA	NA	NA	NA	NA	5	0	128	Fatigue	2	1	0	NA	NA	NA	NA	NA	0	-1	-2	#VALUE!	#VALUE!	#VALUE!	#VALUE!	#VALUE!	5	0	128	Headache	2	1	0	NA
129		B	129	COVID-19 PCR test	1	1	0	NA	14	0	129	Body temperature	38	37.2	36.8	36.6	36.5	36.7	36.6	36.5	36.4	5	1	129	Fatigue	2	2	1	0	0	0	0	0	0	0	-1	-2	-2	-2	-2	-2	7	1	129	Headache	2	2	0	0
130		A	130	COVID-19 PCR test	1	1	0	NA	14	0	130	Body temperature	39.2	37.8	37.1	36.6	36.3	36.5	36.6	36.4	36.7	7	1	130	Fatigue	2	2	2	1	0	0	0	0	0	0	0	-1	-2	-2	-2	-2	9	1	130	Headache	2	2	1	0
131		B	131	COVID-19 PCR test	1	1	0	NA	14	0	131	Body temperature	37.7	37.1	36.4	36.7	36.6	36.6	36.5	36.8	36.7	5	1	131	Fatigue	2	1	0	0	0	0	0	0	0	-1	-2	-2	-2	-2	-2	-2	5	1	131	Headache	2	1	1	0
132		A	132	COVID-19 PCR test	1	1	0	NA	14	0	132	Body temperature	37.4	37	36.7	36.5	36.6	36.4	36.7	36.5	36.6	5	1	132	Fatigue	1	0	0	0	0	0	0	0	0	-1	-1	-1	-1	-1	-1	-1	3	1	132	Headache	2	1	0	0
133		A	133	COVID-19 PCR test	1	1	0	NA	14	0	133	Body temperature	39.1	38.7	38	37.2	36.5	36.6	36.5	36.7	36.4	9	1	133	Fatigue	2	2	2	1	1	1	0	0	0	0	0	-1	-1	-1	-2	-2	14	1	133	Headache	3	2	2	0
134		A	134	COVID-19 PCR test	1	1	0	NA	14	0	134	Body temperature	37.1	37.1	36.8	36.4	36.6	36.6	36.8	36.7	36.5	5	1	134	Fatigue	2	2	1	0	0	0	0	0	0	0	-1	-2	-2	-2	-2	-2	7	1	134	Headache	2	2	1	1
135		A	135	COVID-19 PCR test	1	1	0	NA	14	0	135	Body temperature	38	37.5	36.7	36.6	36.5	36.7	36.8	36.7	36.5	5	1	135	Fatigue	2	2	0	0	0	0	0	0	0	0	-2	-2	-2	-2	-2	-2	5	1	135	Headache	2	2	1	0
136		A	136	COVID-19 PCR test	1	1	0	NA	14	0	136	Body temperature	37.8	37.1	36.5	36.6	36.4	36.6	36.7	36.5	36.4	5	1	136	Fatigue	2	2	1	0	0	0	0	0	0	0	-1	-2	-2	-2	-2	-2	7	1	136	Headache	2	2	2	1
137		A	137	COVID-19 PCR test	1	NA	NA	NA	7	0	137	Body temperature	37.8	37.2	36.5	NA	NA	NA	NA	NA	NA	5	0	137	Fatigue	2	1	0	NA	NA	NA	NA	NA	0	-1	-2	#VALUE!	#VALUE!	#VALUE!	#VALUE!	#VALUE!	5	0	137	Headache	2	2	1	NA
138		A	138	COVID-19 PCR test	1	NA	NA	NA	7	0	138	Body temperature	38.7	37.9	36.9	NA	NA	NA	NA	NA	NA	5	0	138	Fatigue	2	2	2	NA	NA	NA	NA	NA	0	0	0	#VALUE!	#VALUE!	#VALUE!	#VALUE!	#VALUE!	7	0	138	Headache	2	2	2	NA
139		A	139	COVID-19 PCR test	1	NA	NA	NA	7	0	139	Body temperature	37.7	37.1	36.8	NA	NA	NA	NA	NA	NA	5	0	139	Fatigue	2	1	1	NA	NA	NA	NA	NA	0	-1	-1	#VALUE!	#VALUE!	#VALUE!	#VALUE!	#VALUE!	7	0	139	Headache	2	1	0	NA
140		A	140	COVID-19 PCR test	1	1	0	NA	14	0	140	Body temperature	38.1	37.7	36.9	36.7	36.6	36.7	36.4	36.5	36.6	5	1	140	Fatigue	2	2	1	0	0	0	0	0	0	0	-1	-2	-2	-2	-2	-2	7	1	140	Headache	2	2	1	1
	Total	Completed PP analysis	Dropout	Incl.Refused	Steroids	PP	Included in ITT analysis	ITT		14% ARR absolute risk reduction
A	68	53	12	1	3	5.66%	68	4.41%		24% RRR
B	72	46	16	2	10	21.74	72	13.89%		Number Needed to Treat (NNT) is the number of patients you need to treat to prevent one additional bad outcome.
										NNTs are always rounded up to the nearest whole number and accompanied as standard by the 95% confidence interval .
			Power		Power					NNT = 7, if a drug reduces the risk of a bad outcome from 24% to 10%, the ARR = 0.24 - 0.10 = 0.14. Therefore, the NNT = 1/ARR = 7.14
			0.878		0.8703
			p value		p value	0.0236
										Significant result!
										Variant B’s conversion rate (13.89%) was 214.81% higher than variant A’s conversion rate (4.41%). You can be 95% confident that variant B will perform better than variant A.
										Power
										87.03%
										p value
										0.0236
			Significant result!
			Variant B’s conversion rate (21.74%) was 284.06% higher than variant A’s conversion rate (5.66%). You can be 95% confident that variant B will perform better than variant A.
			Power
			94.75%
			p value
			0.0095
[truncated: 269 more columns]

## Sheet: Demographic 
																	day		7	14	21
																		Total	Dropout	Dropout	Dropout	all Dropouts	Steroids		Included in analysis
Trial related assignments			Demographic data							Day 1	Day 7	Day 14	Day 21				A	68	9	5	1	15	3		68
Entry Number	Group	Code	Patient Name	Gender	Age	Height	Weight	BMI	Screening Date	Visit 1	Visit 2	Visit 3	Visit 4	Finish Date	Dropout Date	Reasons and Comments	B	72	12	13	0	25	10		72
1	A	1	TI_ MC	F	49	173	70	23.3887	2021-05-26	2021-05-26	2021-06-01	2021-06-08	2021-06-15	2021-06-15					Steroids	Steroids	Steroids	Steroids
2	A	2	NI_BA	F	35	169	60	21.0077	2021-05-31	2021-05-31	2021-06-06	2021-06-13	dropout	dropout	2021-06-20	FOLLOW-UP REFUSE	A	68	0	3	0	3
3	A	3	NI_ GO	F	57	172	80	27.0416	2021-06-03	2021-06-03	2021-06-09	2021-06-16	2021-06-23	2021-06-23			B	72	5	5	0	10
4	A	4	MA_NE	F	49	167	65	23.3067	2021-06-03	2021-06-03	2021-06-09	2021-06-16	2021-06-23	2021-06-23
5	B	5	NI_DE	F	49	175	63	20.5714	2021-06-08	2021-06-08	2021-06-14	2021-06-21	2021-06-28	2021-06-28					Steroids	Steroids	Steroids					Significant result!
6	A	6	NI_ TA	F	34	168	58	20.5499	2021-06-09	2021-06-09	dropout	dropout	dropout	dropout	2021-06-10	VOLUNTARY REFUSE	A	68	0	3	3					Variant B’s conversion rate (13.89%) was 214.81% higher than variant A’s conversion rate (4.41%). You can be 95% confident that variant B will perform better than variant A.
7	B	7	NA_ MI	F	24	163	50	18.8189	2021-06-09	2021-06-09	2021-06-15	2021-06-22	2021-06-29	2021-06-29			B	72	5	10	10					Power
8	B	8	NA_AB	F	69	165	62	22.7732	2021-06-10	2021-06-10	2021-06-16	dropout	dropout	dropout	2021-06-16	USING STEROIDS										0.8703
9	B	9	MA_ TI	M	45	170	80	27.6817	2021-06-11	2021-06-11	2021-06-17	dropout	dropout	dropout	2021-06-17	USING STEROIDS AND ANTIBIOTICS	A	100	0	4.41176	4.41176					p value
10	B	10	NA_GO	F	33	177	65	20.7476	2021-06-11	2021-06-11	dropout	dropout	dropout	dropout	2021-06-16	USING STEROIDS	B	100	6.94444	13.8889	13.8889					0.0236
11	B	11	OL_KH	F	51	168	85	30.1162	2021-06-11	2021-06-11	2021-06-17	dropout	dropout	dropout	2021-06-18	USING STEROIDS AND ANTIBIOTICS	.
12	B	12	GO_MA	M	66	180	85	26.2346	2021-06-11	2021-06-11	2021-06-17	2021-06-24	2021-07-01	2021-07-01				Total	FOLLOW-UP REFUSE	FOLLOW-UP REFUSE	FOLLOW-UP REFUSE	all follow-up refused
13	A	13	NA_ AK	F	68	170	78	26.9896	2021-06-12	2021-06-12	2021-06-18	2021-06-25	2021-07-02	2021-07-02			A	68	9	2	1	12				Result not significant!
14	B	14	GI_GI	M	43	178	80	25.2493	2021-06-15	2021-06-15	2021-06-21	dropout	dropout	dropout	2021-06-22	USING STEROIDS	B	72	7	8	0	15				Variant B’s conversion rate (20.83%) was 18.06% higher than variant A’s conversion rate (17.65%), but you cannot say, with 95% confidence, that variant B will perform better than variant A.
15	B	15	RE_KA	M	26	175	85	27.7551	2021-06-15	2021-06-15	2021-06-21	dropout	dropout	dropout	2021-06-22	USING STEROIDS										Power
16	B	16	LE_JI	M	20	176	70	22.5981	2021-06-17	2021-06-17	2021-06-23	2021-06-30	2021-07-07	2021-07-07			A	68	9	11	12					0.1098
17	B	17	ZU_VE	M	65	170	84	29.0657	2021-06-23	2021-06-23	2021-06-29	2021-07-06	2021-07-13	2021-07-13			B	72	7	15	15					p value
18	B	18	JU_GI	M	32	170	59	20.4152	2021-06-23	2021-06-23	2021-06-29	2021-07-06	2021-07-13	2021-07-13			A	100	13.2353	16.1765	17.6471					0.316
19	B	19	IN_GU	F	56	167	64	22.9481	2021-06-24	2021-06-24	2021-06-30	2021-07-07	2021-07-14	2021-07-14			B	100	9.72222	20.8333	20.8333
20	A	20	VA_ TU	M	69	168	68	24.093	2021-06-30	2021-06-30	2021-07-06	2021-07-13	2021-07-20	2021-07-20
21	A	21	MA_GU	F	66	170	85	29.4118	2021-07-06	2021-07-06	2021-07-12	dropout	dropout	dropout	2021-07-13	USING STEROIDS	Owerall dropouts
22	A	22	OT_KH	M	29	170	68	23.5294	2021-07-16	2021-07-16	2021-07-22	2021-07-29	2021-08-05	2021-08-05				Total	Dropout	Dropout	Dropout
23	A	23	MA_DA	M	26	184	84	24.811	2021-07-20	2021-07-20	2021-07-26	2021-08-02	2021-08-09	2021-08-09			A	68	9	14	15					Result not significant!
24	B	24	SA_ BA	M	18	182	78	23.5479	2021-07-28	2021-07-28	2021-08-03	2021-08-10	2021-08-17	2021-08-17			B	72	12	25	25					Variant B’s conversion rate (34.72%) was 57.41% higher than variant A’s conversion rate (22.06%), but you cannot say, with 95% confidence, that variant B will perform better than variant A.
25	B	25	TA_PA	M	23	170	70	24.2215	2021-08-12	2021-08-12	2021-08-18	dropout	dropout	dropout	2021-08-25	SUBJECT LOST TO FOLLOW-UP	A	1	13.2353	20.5882	22.0588					Power
26	B	26	LE_BI	F	55	168	70	24.8016	2021-09-07	2021-09-07	2021-09-13	2021-09-20	2021-09-27	2021-09-27			B	1	16.6667	34.7222	34.7222					0.6916
27	A	27	NA_BI	F	81	160	80	31.25	2021-09-07	2021-09-07	2021-09-13	dropout	dropout	dropout	2021-09-14	USING STEROIDS AND ANTIBIOTICS										p value
28	A	28	TA_GZ	F	62	170	80	27.6817	2021-09-25	2021-09-25	2021-10-01	2021-10-08	2021-10-15	2021-10-15												0.0464
29	A	29	DA_KA	F	68	165	75	27.5482	2021-09-29	2021-09-29	2021-10-05	dropout	dropout	dropout	2021-10-12	FOLLOW-UP REFUSE
30	B	30	GI_GE	M	51	175	72	23.5102	2021-09-30	2021-09-30	2021-10-06	2021-10-13	2021-10-20	2021-10-20
31	B	31	NU_AB	F	63	167	62	22.231	2021-10-05	2021-10-05	2021-10-11	2021-10-18	2021-10-25	2021-10-25
32	B	32	MI_AB	M	37	177	88	28.089	2021-10-05	2021-10-05	2021-10-11	dropout	dropout	dropout	2021-10-18	FOLLOW-UP REFUSE
33	B	33	NI_GE	M	19	180	88	27.1605	2021-10-05	2021-10-05	2021-10-11	2021-10-18	2021-10-25	2021-10-25
34	B	34	NI_GV	M	20	173	68	22.7204	2021-10-12	2021-10-12	2021-10-18	2021-10-25	2021-11-01	2021-11-01
35	B	35	EL_KA	F	54	170	77	26.6436	2021-10-18	2021-10-18	dropout	dropout	dropout	dropout	2021-10-19	VOLUNTARY REFUSE
36	A	36	BE_KE	M	64	177	88	28.089	2021-10-19	2021-10-19	2021-10-25	2021-11-01	2021-11-08	2021-11-08
37	B	37	IN_GR	F	36	165	58	21.3039	2021-10-19	2021-10-19	2021-10-25	2021-11-01	2021-11-08	2021-11-08
38	A	38	GI_CH	M	45	174	78	25.763	2021-10-20	2021-10-20	2021-10-26	2021-11-02	2021-11-09	2021-11-09
39	A	39	LE_TA	M	20	172	80	27.0416	2021-10-20	2021-10-20	2021-10-26	2021-11-02	2021-11-09	2021-11-09
40	A	40	FI_KH	F	62	170	85	29.4118	2021-10-21	2021-10-21	2021-10-27	dropout	dropout	dropout	2021-10-29	USING STEROIDS
41	B	41	TA_SH	F	38	165	88	32.3232	2021-10-27	2021-10-27	dropout	dropout	dropout	dropout	2021-10-29	VOLUNTARY REFUSE
42	B	42	SO_TO	F	42	170	68	23.5294	2021-11-01	2021-11-01	2021-11-07	2021-11-14	2021-11-21	2021-11-21
43	B	43	IR_JA	M	42	177	80	25.5354	2021-11-02	2021-11-02	2021-11-08	2021-11-15	2021-11-22	2021-11-22
44	B	44	IA_MA	M	42	178	70	22.0932	2021-11-08	2021-11-08	2021-11-14	dropout	dropout	dropout	2021-11-21	FOLLOW-UP REFUSE
45	B	45	KE_RI	F	68	166	68	24.677	2021-11-12	2021-11-12	2021-11-18	2021-11-25	2021-12-02	2021-12-02
46	B	46	MU_AB	M	65	175	85	27.7551	2021-11-19	2021-11-19	2021-11-25	2021-12-02	2021-12-08	2021-12-08
47	A	47	RO_AB	F	67	168	89	31.5334	2021-11-19	2021-11-19	2021-11-25	2021-12-02	2021-12-08	2021-12-08
48	B	48	GI_SO	M	33	175	81	26.449	2021-11-29	2021-11-29	2021-12-05	2021-12-12	2021-12-19	2021-12-19
49	B	49	LI_ZA	F	39	178	92	29.0367	2021-12-01	2021-12-01	2021-12-07	2021-12-14	2021-12-21	2021-12-21
50	B	50	NA_RO	F	78	170	68	23.5294	2021-12-02	2021-12-02	2021-12-08	dropout	dropout	dropout	2021-12-15	FOLLOW-UP REFUSE
51	B	51	NI_BR	F	62	165	88	32.3232	2021-12-02	2021-12-02	dropout	dropout	dropout	dropout	2021-12-05	USING STEROIDS
52	B	52	IA_KU	M	82	170	68	23.5294	2021-12-02	2021-12-02	dropout	dropout	dropout	dropout	2021-12-05	USING STEROIDS
53	B	53	MZ_SI	F	80	165	73	26.8136	2021-12-02	2021-12-02	dropout	dropout	dropout	dropout	2021-12-05	USING STEROIDS
54	B	54	AM_KE	M	54	180	78	24.0741	2021-12-02	2021-12-02	dropout	dropout	dropout	dropout	2021-12-05	USING STEROIDS
55	B	55	ZA_KU	M	56	170	67	23.1834	2021-12-03	2021-12-03	2021-12-09	2021-12-16	2021-12-23	2021-12-23
56	A	56	DE_CH	M	42	174	87	28.7356	2021-12-03	2021-12-03	2021-12-09	dropout	dropout	dropout	2021-12-16	FOLLOW-UP REFUSE
57	B	57	DA_KV	M	21	171	72	24.623	2021-12-03	2021-12-03	2021-12-09	dropout	dropout	dropout	2021-12-16	FOLLOW-UP REFUSE
58	A	58	NI_NI	F	41	169	68	23.8087	2021-12-06	2021-12-06	2021-12-12	2021-12-19	2021-12-26	2021-12-26
59	A	59	IL_ME	M	54	181	82	25.0298	2021-12-13	2021-12-13	2021-12-19	2021-12-26	2022-01-02	2022-01-02
60	B	60	DA_GO	M	27	176	78	25.1808	2021-12-13	2021-12-13	2021-12-19	2021-12-26	2022-01-02	2022-01-02
61	A	61	TA_RE	F	59	178	72	22.7244	2021-12-17	2021-12-17	2021-12-23	2021-12-30	2022-01-06	2022-01-06					32			3
62	B	62	EK_GE	F	45	170	68	23.5294	2021-12-20	2021-12-20	2021-12-26	2022-01-02	2022-01-09	2022-01-09
63	A	63	BE_VA	M	66	170	85	29.4118	2021-12-21	2021-12-21	2021-12-27	2022-01-03	2022-01-10	2022-01-10
64	B	64	MA_CH	F	46	175	78	25.4694	2021-12-21	2021-12-21	2021-12-27	2022-01-03	2022-01-10	2022-01-10		FOLLOW-UP REFUSE
65	B	65	GI_UG	M	35	170	80	27.6817	2021-12-24	2021-12-24	2021-12-30	dropout	dropout	dropout	2022-01-06
66	B	66	IN_SU	F	45	170	65	22.4913	2022-01-20	2022-01-20	2022-01-26	2022-02-02	2022-02-09	2022-02-09
67	B	67	TA_KA	F	26	166	56	20.3223	2022-01-22	2022-01-22	2022-01-28	2022-02-04	2022-02-11	2022-02-11
68	B	68	TE_MO	M	67	175	85	27.7551	2022-01-26	2022-01-26	2022-02-01	2022-02-08	2022-02-15	2022-02-15
69	A	69	TE_SI	M	70	175	70	22.8571	2022-01-27	2022-01-27	2022-02-02	2022-02-09	2022-02-16	2022-02-16
70	B	70	TA_BA	F	44	168	70	24.8016	2022-01-28	2022-01-28	2022-02-03	2022-02-10	2022-02-17	2022-02-17
71	B	71	DE_SI	F	23	168	50	17.7154	2022-01-31	2022-01-31	2022-02-06	dropout	dropout	dropout	2022-02-07	FOLLOW-UP REFUSE
72	B	72	NA_NA	F	51	175	70	22.8571	2022-01-31	2022-01-31	2022-02-06	dropout	dropout	dropout	2022-02-07	FOLLOW-UP REFUSE
73	A	73	MA_KA	F	30	165	60	22.0386	2022-01-31	2022-01-31	2022-02-06	2022-02-13	2022-02-20	2022-02-20
74	A	74	NI_BA	F	31	175	73	23.8367	2022-01-31	2022-01-31	2022-02-06	2022-02-13	2022-02-20	2022-02-20
75	B	75	TE_GE	F	33	168	53	18.7783	2022-02-04	2022-02-04	2022-02-10	dropout	dropout	dropout	2022-02-12	FOLLOW-UP REFUSE
76	A	76	NA_KA	F	66	164	64	23.7954	2022-02-09	2022-02-09	2022-02-15	2022-02-22	2022-03-01	2022-03-01
77	A	77	TA_BU	F	27	173	68	22.7204	2022-02-09	2022-02-09	2022-02-15	2022-02-22	2022-03-01	2022-03-01
78	A	78	NA_ZA	F	63	170	60	20.7612	2022-02-09	2022-02-09	2022-02-15	2022-02-22	2022-03-01	2022-03-01
79	A	79	AN_AL	M	42	168	60	21.2585	2022-02-19	2022-02-19	dropout	dropout	dropout	dropout	2022-02-25	FOLLOW-UP REFUSE
80	A	80	MA_AS	F	40	175	88	28.7347	2022-02-19	2022-02-19	2022-02-25	2022-03-04	2022-03-11	2022-03-11
81	B	81	TI_LO	F	47	170	80	27.6817	2022-02-21	2022-02-21	2022-02-27	2022-03-06	2022-03-13	2022-03-13
82	B	82	LI_LO	F	60	171	68	23.255	2022-02-22	2022-02-22	2022-02-28	2022-03-07	2022-03-14	2022-03-14
83	A	83	LI_KA	F	38	166	60	21.7738	2022-02-23	2022-02-23	2022-03-01	2022-03-08	2022-03-15	2022-03-15
84	A	84	SH_VA	M	31	178	74	23.3556	2022-02-24	2022-02-24	2022-03-02	2022-03-09	2022-03-16	2022-03-16
85	B	85	NI_VA	F	41	167	64	22.9481	2022-03-01	2022-03-01	2022-03-07	2022-03-14	2022-03-21	2022-03-21
86	A	86	SH_PO	F	43	168	58	20.5499	2022-03-30	2022-03-30	2022-04-05	2022-04-12	2022-04-19	2022-04-19
87	A	87	NI_MO	F	41	168	61	21.6128	2022-05-17	2022-05-17	2022-05-23	2022-05-30	2022-06-06	2022-06-06
88	B	88	TE_UK	M	65	178	113	35.6647	2022-06-16	2022-06-16	2022-06-22	2022-06-29	2022-07-06	2022-07-06
89	A	89	NI_CH	F	74	171	65	22.2291	2022-06-17	2022-06-17	2022-06-23	2022-06-30	2022-07-07	2022-07-07
90	A	90	GI_CH	M	26	184	83	24.5156	2022-06-20	2022-06-20	2022-06-26	2022-07-03	2022-07-10	2022-07-10
91	A	91	TA_KA	F	73	159	75	29.6665	2022-06-27	2022-06-27	2022-07-04	2022-07-11	2022-07-18	2022-07-18
92	B	92	AN_VA	M	82	175	70	22.8571	2022-06-27	2022-06-27	2022-07-04	2022-07-11	2022-07-18	2022-07-18
93	A	93	AN_KH	M	73	176	70	22.5981	2022-07-21	2022-07-21	2022-07-27	2022-08-03	2022-08-10	2022-08-10
94	A	94	SH_KA	F	34	165	75	27.5482	2022-07-25	2022-07-25	2022-07-31	2022-08-07	2022-08-14	2022-08-14
95	A	95	LA_CH	M	25	182	85	25.6612	2022-08-01	2022-08-01	2022-08-07	2022-08-14	2022-08-21	2022-08-21
96	B	96	TA_JO	F	61	170	80	27.6817	2022-08-01	2022-08-01	2022-08-07	2022-08-14	2022-08-21	2022-08-21
97	A	97	MA_TE	F	56	165	67	24.6097	2022-08-01	2022-08-01	2022-08-07	2022-08-14	2022-08-21	2022-08-21
98	A	98	GI_SO	M	34	178	90	28.4055	2022-08-02	2022-08-02	2022-08-08	2022-08-15	2022-08-22	2022-08-22
99	A	99	IZ_LA	F	61	167	62	22.231	2022-08-02	2022-08-02	2022-08-08	2022-08-15	2022-08-22	2022-08-22
100	A	100	GR_GU	M	64	180	88	27.1605	2022-08-02	2022-08-02	2022-08-08	2022-08-15	2022-08-22	2022-08-22
101	A	101	NI_OT	F	45	166	65	23.5883	2022-08-02	2022-08-02	2022-08-08	2022-08-15	2022-08-22	2022-08-22
102	A	102	SH_MU	F	42	163	58	21.83	2022-08-04	2022-08-04	2022-08-10	2022-08-17	2022-08-24	2022-08-24
103	B	103	MA_KU	F	26	158	55	22.0317	2022-08-08	2022-08-08	2022-08-14	2022-08-21	2022-08-28	2022-08-28
104	A	104	GI_KA	M	32	185	89	26.0044	2022-08-12	2022-08-12	2022-08-18	2022-08-25	2022-09-01	2022-09-01
105	B	105	KE_MO	F	57	163	73	27.4756	2022-08-17	2022-08-17	2022-08-23	2022-08-30	2022-09-06	2022-09-06
106	B	106	SA_OR	F	36	162	55	20.9572	2022-08-17	2022-08-17	dropout	dropout	dropout	dropout	2022-08-23	FOLLOW-UP REFUSE
107	B	107	LE_OR	F	37	164	54	20.0773	2022-08-17	2022-08-17	dropout	dropout	dropout	dropout	2022-08-23	FOLLOW-UP REFUSE
108	B	108	NA_OR	F	66	160	59	23.0469	2022-08-17	2022-08-17	dropout	dropout	dropout	dropout	2022-08-23	FOLLOW-UP REFUSE
109	B	109	TA_ KU	F	37	167	58	20.7967	2022-08-18	2022-08-18	2022-08-24	2022-08-31	2022-09-07	2022-09-07
110	B	110	NU_GU	M	59	170	75	25.9516	2022-08-23	2022-08-23	2022-08-29	2022-09-05	2022-09-12	2022-09-12
111	A	111	NA_GU	F	36	164	55	20.4491	2022-08-23	2022-08-23	2022-08-29	2022-09-05	2022-09-12	2022-09-12
112	B	112	NA_ME	F	46	167	59	21.1553	2022-08-25	2022-08-25	2022-08-31	2022-09-07	2022-09-14	2022-09-14
113	B	113	TO_KE	M	18	178	75	23.6713	2022-08-25	2022-08-25	2022-08-31	2022-09-07	2022-09-14	2022-09-14
114	A	114	AL_NA	M	29	170	90	31.1419	2022-08-30	2022-08-30	2022-09-05	2022-09-12	2022-09-19	2022-09-19
115	B	115	NI_NA	F	54	168	60	21.2585	2022-09-02	2022-09-02	2022-09-08	2022-09-15	2022-09-22	2022-09-22
116	A	116	TI_BA	F	38	161	56	21.6041	2022-09-05	2022-09-05	2022-09-11	2022-09-18	2022-09-25	2022-09-25
117	A	117	MZ_KA	F	62	165	67	24.6097	2022-09-05	2022-09-05	2022-09-11	2022-09-18	2022-09-25	2022-09-25
118	B	118	VL_BA	M	62	178	89	28.0899	2022-09-05	2022-09-05	2022-09-11	2022-09-18	2022-09-25	2022-09-25
119	B	119	GI_KA	M	60	179	90	28.089	2022-09-05	2022-09-05	2022-09-11	2022-09-18	2022-09-25	2022-09-25
120	B	120	TI_NE	F	22	162	69	26.2917	2022-09-05	2022-09-05	dropout	dropout	dropout	dropout	2022-09-11	FOLLOW-UP REFUSE
121	A	121	NE_SA	F	69	162	73	27.8159	2022-09-06	2022-09-06	dropout	dropout	dropout	dropout	2022-09-12	FOLLOW-UP REFUSE
122	B	122	KR_SA	F	43	165	61	22.4059	2022-09-06	2022-09-06	dropout	dropout	dropout	dropout	2022-09-12	FOLLOW-UP REFUSE
123	A	123	TA_GE	F	33	170	54	18.6851	2022-09-06	2022-09-06	2022-09-12	2022-09-19	2022-09-26	2022-09-26
124	A	124	MA_GE	F	19	166	70	25.4028	2022-09-10	2022-09-10	dropout	dropout	dropout	dropout	2022-09-16	FOLLOW-UP REFUSE
125	A	125	NA_LA	F	63	166	70	25.4028	2022-09-12	2022-09-12	dropout	dropout	dropout	dropout	2022-09-18	FOLLOW-UP REFUSE
126	B	126	TA_KH	F	38	160	50	19.5312	2022-09-13	2022-09-13	2022-09-19	2022-09-26	2022-10-03	2022-10-03
127	A	127	NI_KA	F	82	171	90	30.7787	2022-09-20	2022-09-20	2022-09-26	2022-10-03	2022-10-10	2022-10-10
128	A	128	NA_GA	F	32	165	55	20.202	2022-09-23	2022-09-23	dropout	dropout	dropout	dropout	29/09/2022	FOLLOW-UP REFUSE
129	B	129	EK_GE	F	46	163	68	25.5937	2022-09-26	2022-09-26	2022-10-02	2022-10-09	2022-10-16	2022-10-16
130	A	130	MA_AR	F	56	162	60	22.8624	2022-09-27	2022-09-27	2022-10-03	2022-10-10	2022-10-17	2022-10-17
131	B	131	LE_BA	M	31	167	65	23.3067	2022-09-28	2022-09-28	2022-10-04	2022-10-11	2022-10-18	2022-10-18
132	A	132	MA_KV	F	31	161	52	20.061	2022-09-28	2022-09-28	2022-10-04	2022-10-11	2022-10-18	2022-10-18
133	A	133	KN_TO	M	84	170	68	23.5294	2022-10-03	2022-10-03	2022-10-09	2022-10-16	2022-10-23	2022-10-23
134	A	134	IO_GA	M	67	180	85	26.2346	2022-10-04	2022-10-04	2022-10-10	2022-10-17	2022-10-24	2022-10-24
135	A	135	KH_KA	F	55	175	69	22.5306	2022-10-06	2022-10-06	2022-10-12	2022-10-19	2022-10-26	2022-10-26
136	A	136	LA_NA	F	81	158	52	20.83	2022-10-07	2022-10-07	2022-10-13	2022-10-20	2022-10-27	2022-10-27
137	A	137	TA_TU	F	28	169	56	19.6072	2022-10-07	2022-10-07	dropout	dropout	dropout	dropout	13/10/2022	FOLLOW-UP REFUSE
138	A	138	DI_ON	M	80	185	65	18.992	2022-10-07	2022-10-07	dropout	dropout	dropout	dropout	13/10/2022	FOLLOW-UP REFUSE
139	A	139	EK_ON	F	51	170	68	23.5294	2022-10-07	2022-10-07	dropout	dropout	dropout	dropout	13/10/2022	FOLLOW-UP REFUSE
140	A	140	EK_DE	F	54	174	77	25.4327	2022-10-11	2022-10-11	2022-10-17	2022-10-24	2022-10-31	2022-10-31
